# Supplementary material
Source: publisher figshare collection journal article supplement (https://acs.figshare.com/ndownloader/files/5533727)
Supplement: Supplementary file 1 [file 5533727]

## **CO<sub>2</sub>-responsive polymer functionalized Au nanoparticles for CO<sub>2</sub> sensor**

Ying Ma<sup>†\*</sup>, Kittithat Promthaveepong<sup>†</sup> and Nan Li<sup>‡\*</sup>

<sup>†</sup> Department of Chemical and Biomolecular Engineering, National University of Singapore, 10 Kent Ridge Crescent, Singapore 119260, Singapore

<sup>‡</sup> Division of Bioengineering, School of Chemical & Biomedical Engineering, Nanyang Technological University, 70 Nanyang Drive, Singapore 637457, Singapore

Corresponding Author \*

E-mail: [chemay@nus.edu.sg](mailto:chemay@nus.edu.sg)

[linan@ntu.edu.sg](mailto:linan@ntu.edu.sg)

Keywords: CO<sub>2</sub>-responsive polymer, nanoparticles, colorimetric CO<sub>2</sub> sensor

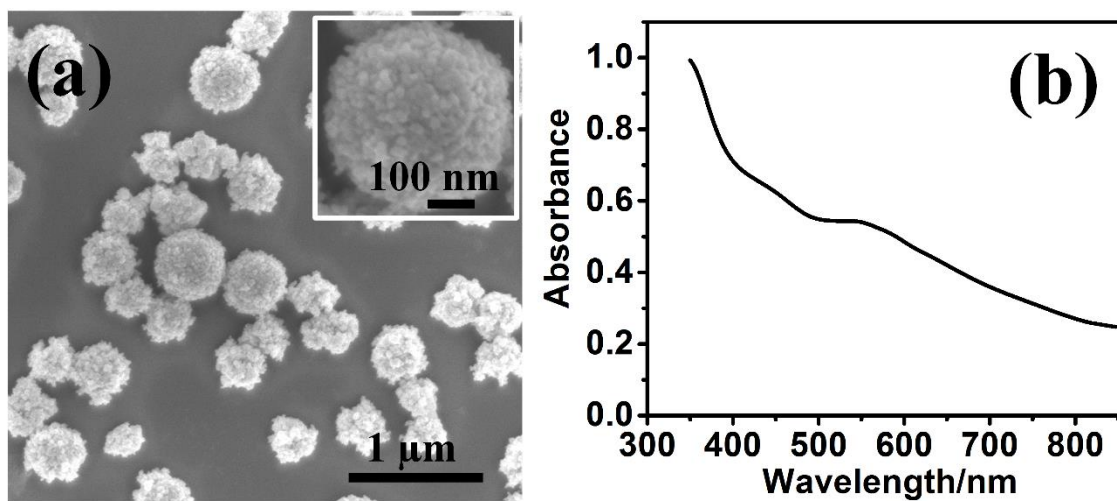

Figure S1. (a) SEM and (b) UV absorption spectra of Au NPs synthesized in the presence of 0.8 mg/ml PVP concentration using ANI as reducing agent.

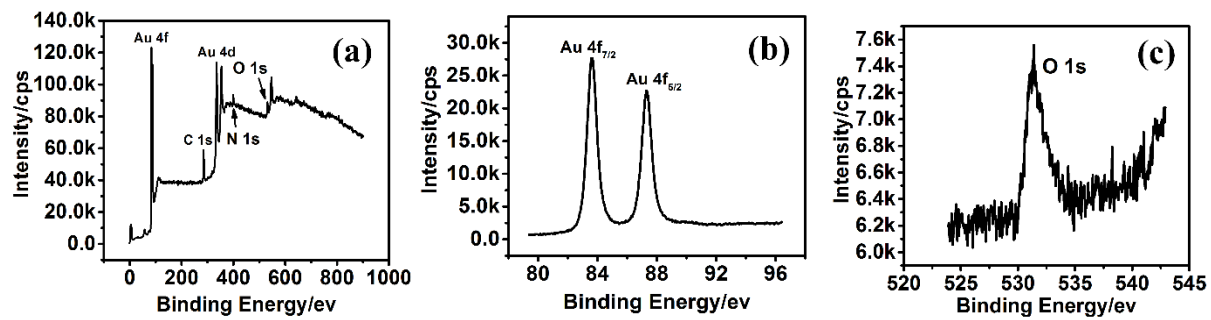

Figure S2. XPS spectra of Au NP1.6. (a) Survey spectrum, high-resolution spectra of (b) Au 4f and (c) O 1s.
